# Supplementary material for: Associations between dietary fiber intake and cardiovascular risk factors: An umbrella review of meta-analyses of randomized controlled trials
Source: PubMed Central journal article supplement (PMC9511151; doi:10.3389/fnut.2022.972399), 2022-09-12
Supplement: Data_Sheet_1.pdf [file Data_Sheet_1.pdf]

|  |                                                                                                                                                                                                                                                                                                                                                                                                                                                                                                                                                                                                                                                                                                                                                                                                                                                                                                                                                                                                                                                                                                                                                                                                                                                                                                                                                                                                                                                                                                                                                                                                                                                                                                                                                                                                                                                                                                                                                                                                                                                                                                                                                                                                                                                                                                                                                                                                                                                                                                                                                                                                                                                                                                                                                                                                                                                                                                       |    |               |
|--|-------------------------------------------------------------------------------------------------------------------------------------------------------------------------------------------------------------------------------------------------------------------------------------------------------------------------------------------------------------------------------------------------------------------------------------------------------------------------------------------------------------------------------------------------------------------------------------------------------------------------------------------------------------------------------------------------------------------------------------------------------------------------------------------------------------------------------------------------------------------------------------------------------------------------------------------------------------------------------------------------------------------------------------------------------------------------------------------------------------------------------------------------------------------------------------------------------------------------------------------------------------------------------------------------------------------------------------------------------------------------------------------------------------------------------------------------------------------------------------------------------------------------------------------------------------------------------------------------------------------------------------------------------------------------------------------------------------------------------------------------------------------------------------------------------------------------------------------------------------------------------------------------------------------------------------------------------------------------------------------------------------------------------------------------------------------------------------------------------------------------------------------------------------------------------------------------------------------------------------------------------------------------------------------------------------------------------------------------------------------------------------------------------------------------------------------------------------------------------------------------------------------------------------------------------------------------------------------------------------------------------------------------------------------------------------------------------------------------------------------------------------------------------------------------------------------------------------------------------------------------------------------------------|----|---------------|
|  | <p>Fields) OR ("dietary fiber"[MeSH Terms] OR ("dietary"[All Fields] AND "fiber"[All Fields]) OR "dietary fiber"[All Fields] OR "fiber"[All Fields] OR "fibre"[All Fields] OR "fiber s"[All Fields] OR "fiberized"[All Fields] OR "fibers"[All Fields] OR "fibre s"[All Fields] OR "fibres"[All Fields]) OR ("whole grains"[MeSH Terms] OR ("whole"[All Fields] AND "grains"[All Fields]) OR "whole grains"[All Fields] OR ("whole"[All Fields] AND "grain"[All Fields]) OR "whole grain"[All Fields]) OR (("whole"[All Fields] OR "wholeness"[All Fields] OR "wholes"[All Fields]) AND ("triticum"[MeSH Terms] OR "triticum"[All Fields] OR "wheat"[All Fields] OR "wheat s"[All Fields] OR "wheats"[All Fields])) OR ("cereale"[All Fields] OR "edible grain"[MeSH Terms] OR ("edible"[All Fields] AND "grain"[All Fields]) OR "edible grain"[All Fields] OR "cereal"[All Fields] OR "cereals"[All Fields]) OR ("dietary fiber"[MeSH Terms] OR ("dietary"[All Fields] AND "fiber"[All Fields]) OR "dietary fiber"[All Fields] OR ("wheat"[All Fields] AND "bran"[All Fields]) OR "wheat bran"[All Fields]) OR "bran"[All Fields] OR ("barley s"[All Fields] OR "hordeum"[MeSH Terms] OR "hordeum"[All Fields] OR "barley"[All Fields] OR "barleys"[All Fields]) OR "oat"[All Fields] OR ("beta glucans"[MeSH Terms] OR "beta glucans"[All Fields] OR ("beta"[All Fields] AND "glucans"[All Fields]) OR "beta glucans"[All Fields]) OR ("glucans"[MeSH Terms] OR "glucans"[All Fields] OR "glucan"[All Fields]) OR ("cellulose"[MeSH Terms] OR "cellulose"[All Fields] OR "celluloses"[All Fields] OR "cellulosic"[All Fields] OR "cellulosics"[All Fields]) OR ("pectin s"[All Fields] OR "pectinate"[All Fields] OR "pectinates"[All Fields] OR "pectinic"[All Fields] OR "pectins"[MeSH Terms] OR "pectins"[All Fields] OR "pectin"[All Fields]) OR ("resistant starch"[MeSH Terms] OR ("resistant"[All Fields] AND "starch"[All Fields]) OR "resistant starch"[All Fields]) OR ("secale"[MeSH Terms] OR "secale"[All Fields] OR ("secale"[All Fields] AND "cereale"[All Fields]) OR "secale cereale"[All Fields] OR "rye"[All Fields] OR ("secale"[MeSH Terms] OR "secale"[All Fields] OR "ryes"[All Fields]) OR ("spelts"[All Fields] OR "triticum"[MeSH Terms] OR "triticum"[All Fields] OR "spelt"[All Fields]) OR ("triticum"[MeSH Terms] OR "triticum"[All Fields]) OR ("oryza"[MeSH Terms] OR "oryza"[All Fields] OR "rice"[All Fields]) OR ("oryza"[MeSH Terms] OR "oryza"[All Fields] OR "rices"[All Fields]) OR ("oryza"[MeSH Terms] OR "oryza"[All Fields] OR ("oryza"[All Fields] AND "sativa"[All Fields]) OR "oryza sativa"[All Fields]) OR ("fructooligosaccharide"[Supplementary Concept] OR "fructooligosaccharide"[All Fields] OR "fructooligosaccharides"[All Fields]) OR ("inulin"[MeSH Terms] OR "inulin"[All Fields] OR "inuline"[All Fields] OR "inulins"[All Fields])</p> |    |               |
|  | <p>"blood glucose"[MeSH Terms] OR ("blood"[All Fields] AND "glucose"[All Fields]) OR "blood glucose"[All Fields] OR ("blood glucose"[MeSH Terms] OR ("blood"[All Fields] AND "glucose"[All Fields]) OR "blood glucose"[All Fields] OR ("blood"[All Fields] AND "sugar"[All Fields]) OR "blood sugar"[All Fields]) OR (("fasting"[MeSH Terms] OR "fasting"[All Fields] OR "fast"[All Fields]) AND ("plasma"[MeSH Terms] OR "plasma"[All Fields] OR "plasmas"[All Fields] OR "plasma s"[All Fields]) AND ("glucose"[MeSH Terms] OR "glucose"[All Fields] OR "glucoses"[All Fields] OR "glucose s"[All Fields])) OR "FPG"[All Fields] OR ("glycated hemoglobin a"[MeSH</p>                                                                                                                                                                                                                                                                                                                                                                                                                                                                                                                                                                                                                                                                                                                                                                                                                                                                                                                                                                                                                                                                                                                                                                                                                                                                                                                                                                                                                                                                                                                                                                                                                                                                                                                                                                                                                                                                                                                                                                                                                                                                                                                                                                                                                               | #2 | 3968205 items |

|  |                                                                                                                                                                                                                                                                                                                                                                                                                                                                                                                                                                                                                                                                                                                                                                                                                                                                                                                                                                                                                                                                                                                                                                                                                                                                                                                                                                                                                                                                                                                                                                                                                                                                                                                                                                                                                                                                                                                                                                                                                                                                                                                                                                                                                                                                                                                                                                                                                                                                                                                                                                                                                                                                                                                                                                                                                                                                                                                                                                                                                                                                                                                                                                                                                                                                                                                                                                                                                                                                                                                                                                                                          |  |
|--|----------------------------------------------------------------------------------------------------------------------------------------------------------------------------------------------------------------------------------------------------------------------------------------------------------------------------------------------------------------------------------------------------------------------------------------------------------------------------------------------------------------------------------------------------------------------------------------------------------------------------------------------------------------------------------------------------------------------------------------------------------------------------------------------------------------------------------------------------------------------------------------------------------------------------------------------------------------------------------------------------------------------------------------------------------------------------------------------------------------------------------------------------------------------------------------------------------------------------------------------------------------------------------------------------------------------------------------------------------------------------------------------------------------------------------------------------------------------------------------------------------------------------------------------------------------------------------------------------------------------------------------------------------------------------------------------------------------------------------------------------------------------------------------------------------------------------------------------------------------------------------------------------------------------------------------------------------------------------------------------------------------------------------------------------------------------------------------------------------------------------------------------------------------------------------------------------------------------------------------------------------------------------------------------------------------------------------------------------------------------------------------------------------------------------------------------------------------------------------------------------------------------------------------------------------------------------------------------------------------------------------------------------------------------------------------------------------------------------------------------------------------------------------------------------------------------------------------------------------------------------------------------------------------------------------------------------------------------------------------------------------------------------------------------------------------------------------------------------------------------------------------------------------------------------------------------------------------------------------------------------------------------------------------------------------------------------------------------------------------------------------------------------------------------------------------------------------------------------------------------------------------------------------------------------------------------------------------------------------|--|
|  | <p>Terms] OR "glycated hemoglobin a"[All Fields]) OR ("glycated hemoglobin a"[MeSH Terms] OR "glycated hemoglobin a"[All Fields] OR ("glycated"[All Fields] AND "hemoglobin"[All Fields]) OR "glycated hemoglobin"[All Fields]) OR ("glycated hemoglobin a"[MeSH Terms] OR "glycated hemoglobin a"[All Fields] OR "hba1c"[All Fields] OR "hba1cs"[All Fields]) OR ("insulin"[MeSH Terms] OR "insulin"[All Fields] OR "insulin s"[All Fields] OR "insuline"[All Fields] OR "insulinic"[All Fields] OR "insulinization"[All Fields] OR "insulinized"[All Fields] OR "insulins"[MeSH Terms] OR "insulins"[All Fields]) OR (("homeostasis"[All Fields] OR "homeostasis"[MeSH Terms] OR "homeostasis"[All Fields]) AND ("model"[All Fields] OR "model s"[All Fields] OR "modeled"[All Fields] OR "modeler"[All Fields] OR "modeler s"[All Fields] OR "modelers"[All Fields] OR "modeling"[All Fields] OR "modelings"[All Fields] OR "modelization"[All Fields] OR "modelizations"[All Fields] OR "modelize"[All Fields] OR "modelized"[All Fields] OR "modelled"[All Fields] OR "modeller"[All Fields] OR "modellers"[All Fields] OR "modelling"[All Fields] OR "modellings"[All Fields] OR "models"[All Fields]) AND ("assess"[All Fields] OR "assessed"[All Fields] OR "assessment"[All Fields] OR "assesses"[All Fields] OR "assessing"[All Fields] OR "assessment"[All Fields] OR "assessment s"[All Fields] OR "assessments"[All Fields]) AND ("insulin resistance"[MeSH Terms] OR ("insulin"[All Fields] AND "resistance"[All Fields]) OR "insulin resistance"[All Fields])) OR "HOMA-IR"[All Fields] OR ("cholesterol"[MeSH Terms] OR "cholesterol"[All Fields] OR "cholesterol s"[All Fields] OR "cholesterole"[All Fields] OR "cholesterols"[All Fields]) OR ("lipid s"[All Fields] OR "lipidate"[All Fields] OR "lipidated"[All Fields] OR "lipidates"[All Fields] OR "lipidation"[All Fields] OR "lipidations"[All Fields] OR "lipide"[All Fields] OR "lipides"[All Fields] OR "lipidic"[All Fields] OR "lipids"[MeSH Terms] OR "lipids"[All Fields] OR "lipid"[All Fields]) OR (("total"[All Fields] OR "total ed"[All Fields] OR "totaling"[All Fields] OR "totalled"[All Fields] OR "totalling"[All Fields] OR "totals"[All Fields]) AND ("cholesterol"[MeSH Terms] OR "cholesterol"[All Fields] OR "cholesterol s"[All Fields] OR "cholesterole"[All Fields] OR "cholesterols"[All Fields])) OR ("cryosphere"[Journal] OR "tc"[All Fields]) OR ("triglycerid"[All Fields] OR "triglycerides"[MeSH Terms] OR "triglycerides"[All Fields] OR "triglyceride"[All Fields] OR "triglycerids"[All Fields]) OR ("trans gis"[Journal] OR "ieec trans games"[Journal] OR "tg"[All Fields]) OR ("cholesterol, hdl"[MeSH Terms] OR ("cholesterol"[All Fields] AND "hdl"[All Fields]) OR "hdl cholesterol"[All Fields] OR ("high"[All Fields] AND "density"[All Fields] AND "lipoprotein"[All Fields] AND "cholesterol"[All Fields]) OR "high density lipoprotein cholesterol"[All Fields]) OR "HDL-C"[All Fields] OR ("cholesterol, ldl"[MeSH Terms] OR ("cholesterol"[All Fields] AND "ldl"[All Fields]) OR "ldl cholesterol"[All Fields] OR ("low"[All Fields] AND "density"[All Fields] AND "lipoprotein"[All Fields] AND "cholesterol"[All Fields]) OR "low density lipoprotein cholesterol"[All Fields]) OR "LDL-C"[All Fields] OR ("blood pressure"[MeSH Terms] OR ("blood"[All Fields] AND "pressure"[All Fields]) OR "blood pressure"[All Fields] OR "blood pressure determination"[MeSH Terms] OR ("blood"[All Fields] AND "pressure"[All Fields] AND "determination"[All Fields]) OR "blood</p> |  |
|--|----------------------------------------------------------------------------------------------------------------------------------------------------------------------------------------------------------------------------------------------------------------------------------------------------------------------------------------------------------------------------------------------------------------------------------------------------------------------------------------------------------------------------------------------------------------------------------------------------------------------------------------------------------------------------------------------------------------------------------------------------------------------------------------------------------------------------------------------------------------------------------------------------------------------------------------------------------------------------------------------------------------------------------------------------------------------------------------------------------------------------------------------------------------------------------------------------------------------------------------------------------------------------------------------------------------------------------------------------------------------------------------------------------------------------------------------------------------------------------------------------------------------------------------------------------------------------------------------------------------------------------------------------------------------------------------------------------------------------------------------------------------------------------------------------------------------------------------------------------------------------------------------------------------------------------------------------------------------------------------------------------------------------------------------------------------------------------------------------------------------------------------------------------------------------------------------------------------------------------------------------------------------------------------------------------------------------------------------------------------------------------------------------------------------------------------------------------------------------------------------------------------------------------------------------------------------------------------------------------------------------------------------------------------------------------------------------------------------------------------------------------------------------------------------------------------------------------------------------------------------------------------------------------------------------------------------------------------------------------------------------------------------------------------------------------------------------------------------------------------------------------------------------------------------------------------------------------------------------------------------------------------------------------------------------------------------------------------------------------------------------------------------------------------------------------------------------------------------------------------------------------------------------------------------------------------------------------------------------------|--|

|                  |                                                                                                                                                                                                                                                                                                                                                                                                                                                                                                                                                                                                                                                                                                                                                                                                                                                                                                                                                                                                                                                                                                                                                                                                                                                                                                                                                                                                                                                                                                                                                                                                                                                                                                                                                                                                                                                                                                                                                                                                                                                    |           |                   |
|------------------|----------------------------------------------------------------------------------------------------------------------------------------------------------------------------------------------------------------------------------------------------------------------------------------------------------------------------------------------------------------------------------------------------------------------------------------------------------------------------------------------------------------------------------------------------------------------------------------------------------------------------------------------------------------------------------------------------------------------------------------------------------------------------------------------------------------------------------------------------------------------------------------------------------------------------------------------------------------------------------------------------------------------------------------------------------------------------------------------------------------------------------------------------------------------------------------------------------------------------------------------------------------------------------------------------------------------------------------------------------------------------------------------------------------------------------------------------------------------------------------------------------------------------------------------------------------------------------------------------------------------------------------------------------------------------------------------------------------------------------------------------------------------------------------------------------------------------------------------------------------------------------------------------------------------------------------------------------------------------------------------------------------------------------------------------|-----------|-------------------|
|                  | <p>pressure determination"[All Fields] OR ("blood"[All Fields] AND "pressure"[All Fields]) OR "blood pressure"[All Fields] OR "arterial pressure"[MeSH Terms] OR ("arterial"[All Fields] AND "pressure"[All Fields]) OR "arterial pressure"[All Fields] OR ("blood"[All Fields] AND "pressure"[All Fields])) OR ("hypertense"[All Fields] OR "hypertension"[MeSH Terms] OR "hypertension"[All Fields] OR "hypertension s"[All Fields] OR "hypertensions"[All Fields] OR "hypertensive"[All Fields] OR "hypertensive s"[All Fields] OR "hypertensives"[All Fields]) OR ("blood pressure"[MeSH Terms] OR ("blood"[All Fields] AND "pressure"[All Fields]) OR "blood pressure"[All Fields] OR ("systolic"[All Fields] AND "blood"[All Fields] AND "pressure"[All Fields]) OR "systolic blood pressure"[All Fields]) OR "SBP"[All Fields] OR ("blood pressure"[MeSH Terms] OR ("blood"[All Fields] AND "pressure"[All Fields]) OR "blood pressure"[All Fields] OR ("diastolic"[All Fields] AND "blood"[All Fields] AND "pressure"[All Fields]) OR "diastolic blood pressure"[All Fields]) OR "DBP"[All Fields] OR ("inflammatories"[All Fields] OR "inflammatory"[All Fields]) OR ("tumour necrosis factor alpha"[All Fields] OR "tumor necrosis factor alpha"[MeSH Terms] OR ("tumor"[All Fields] AND "necrosis"[All Fields] AND "factor alpha"[All Fields]) OR "tumor necrosis factor alpha"[All Fields] OR ("tumor"[All Fields] AND "necrosis"[All Fields] AND "factor"[All Fields] AND "alpha"[All Fields]) OR "tumor necrosis factor alpha"[All Fields]) OR ("tumor necrosis factor alpha"[MeSH Terms] OR ("tumor"[All Fields] AND "necrosis"[All Fields] AND "factor alpha"[All Fields]) OR "tumor necrosis factor alpha"[All Fields] OR ("tnf"[All Fields] AND "alpha"[All Fields]) OR "tnf alpha"[All Fields]) OR ("c reactive protein"[MeSH Terms] OR ("c reactive"[All Fields] AND "protein"[All Fields]) OR "c reactive protein"[All Fields] OR "c reactive protein"[All Fields]) OR ("curr res psychol"[Journal] OR "crp"[All Fields])</p> |           |                   |
|                  | <p>"systematic review"[Publication Type] OR "systematic reviews as topic"[MeSH Terms] OR "systematic review"[All Fields] OR "systematic review"[Publication Type] OR "systematic reviews as topic"[MeSH Terms] OR "review systematic"[All Fields] OR "meta analysis"[Publication Type] OR "meta analysis as topic"[MeSH Terms] OR "meta analysis"[All Fields]</p>                                                                                                                                                                                                                                                                                                                                                                                                                                                                                                                                                                                                                                                                                                                                                                                                                                                                                                                                                                                                                                                                                                                                                                                                                                                                                                                                                                                                                                                                                                                                                                                                                                                                                  | #3        | 371281 items      |
|                  | <b>#1 AND #2 AND #3</b>                                                                                                                                                                                                                                                                                                                                                                                                                                                                                                                                                                                                                                                                                                                                                                                                                                                                                                                                                                                                                                                                                                                                                                                                                                                                                                                                                                                                                                                                                                                                                                                                                                                                                                                                                                                                                                                                                                                                                                                                                            | <b>#4</b> | <b>952 items</b>  |
| Scopus           | ( TITLE-ABS-KEY ( dietary AND fiber* ) AND TITLE-ABS-KEY ( systematic AND review OR meta-analysis ) )                                                                                                                                                                                                                                                                                                                                                                                                                                                                                                                                                                                                                                                                                                                                                                                                                                                                                                                                                                                                                                                                                                                                                                                                                                                                                                                                                                                                                                                                                                                                                                                                                                                                                                                                                                                                                                                                                                                                              | <b>#1</b> | <b>1042 items</b> |
| Cochrane library | <p>dietary fiber or fiber or fibre or whole grain or whole wheat or cereals or wheat bran or bran or barley or oat or beta-glucans or glucans or cellulose or pectin or resistant starch or secale cereale or rye or ryes or spelt or triticum or rice or rices or oryza sativa or fructooligosaccharides or inulin in Title Abstract Keyword AND systematic review or review, systematic or meta-analysis in Title Abstract Keyword</p>                                                                                                                                                                                                                                                                                                                                                                                                                                                                                                                                                                                                                                                                                                                                                                                                                                                                                                                                                                                                                                                                                                                                                                                                                                                                                                                                                                                                                                                                                                                                                                                                           | #1        | <b>263 items</b>  |

Table S2. The lists of 23 excluded meta-analyses

| Reasons                                                                                  | Titles                                                                                                                                                                                                           | WOS                                                    |
|------------------------------------------------------------------------------------------|------------------------------------------------------------------------------------------------------------------------------------------------------------------------------------------------------------------|--------------------------------------------------------|
| <p data-bbox="260 1077 448 1234"><b>Meeting abstracts or letter to editors (n=7)</b></p> | <p data-bbox="486 371 1016 483">A systematic review and meta-analysis of RCTs on the effect of psyllium fiber on lipid targets for CVD risk reduction</p>                                                        | <p data-bbox="1086 416 1300 443">000405461404241</p>   |
|                                                                                          | <p data-bbox="486 589 1016 701">Dietary fibre and glycaemic control in patients with diabetes: a systematic review and meta-analysis of randomised clinical trials</p>                                           | <p data-bbox="1086 633 1300 660">000307671302066</p>   |
|                                                                                          | <p data-bbox="486 813 1016 925">The Effects Of Soluble Dietary Fiber On Blood Pressure: A Systematic Review And Meta Analysis Of Randomized Controlled Trials</p>                                                | <p data-bbox="1086 857 1300 884">000406444701258</p>   |
|                                                                                          | <p data-bbox="486 1037 1016 1193">The Effect of Oat Beta-Glucan on Clinical Lipid Markers for Cardiovascular Disease Risk Reduction: A Systematic Review &amp; Meta-Analysis of Randomized Controlled Trials</p> | <p data-bbox="1086 1093 1300 1120">000406444701310</p> |
|                                                                                          | <p data-bbox="499 1294 1003 1361">Dietary fiber lowers blood pressure: A meta-analysis of randomised trials</p>                                                                                                  | <p data-bbox="1086 1317 1300 1344">000222497400722</p> |
|                                                                                          | <p data-bbox="486 1473 1016 1585">barley beta-glucan and its cholesterol lowering capacity: a meta-analysis of randomized controlled trials</p>                                                                  | <p data-bbox="1086 1518 1300 1545">000270827201846</p> |
|                                                                                          | <p data-bbox="515 1787 987 1854">Meta-analysis of the cholesterol-lowering effects of dietary fiber</p>                                                                                                          | <p data-bbox="1086 1809 1300 1836">000083356200029</p> |

|                                                          |                                                                                                                                                            |                 |
|----------------------------------------------------------|------------------------------------------------------------------------------------------------------------------------------------------------------------|-----------------|
| <b>Systematic review without meta-analysis (n=4)</b>     | The Effect of Isolated and Synthetic Dietary Fibers on Markers of Metabolic Diseases in Human Intervention Studies: A Systematic Review                    | 000522557900017 |
|                                                          | The effects of dietary fibre on C-reactive protein, an inflammation marker predicting cardiovascular disease                                               | 000268650100001 |
|                                                          | Effects of Dietary Fiber and Low Glycemic Index Diet on Glucose Control in Subjects with Type 2 Diabetes Mellitus                                          | 000284195200012 |
|                                                          | The effects of red yeast rice dietary supplement on blood pressure, lipid profile, and C-reactive protein in hypertension: A systematic review             | 000396781200006 |
| <b>Results are confounded by non-dietary fiber (n=9)</b> | Glycemic response and health - a systematic review and meta-analysis: relations between dietary glycemic properties and health outcomes                    | 000252298500041 |
|                                                          | The effects of nondigestible fermentable carbohydrates on adults with overweight or obesity: a meta-analysis of randomized controlled trials               | 000748175200003 |
|                                                          | The Effect of Dietary Glycaemic Index on Glycaemia in Patients with Type 2 Diabetes: A Systematic Review and Meta-Analysis of Randomized Controlled Trials | 000428405300114 |
|                                                          | Dietary fibre and whole grains in diabetes management: Systematic review and meta-analyses                                                                 | 000558139500014 |
|                                                          | Low glycaemic index diets and blood lipids: A systematic review and meta-analysis of randomised controlled trials                                          | 000314111800006 |
|                                                          | Chitosan modifies glycemic levels in people with metabolic syndrome and related disorders: meta-analysis with trial sequential analysis                    | 000595082600001 |
|                                                          | Red Yeast Rice for Hyperlipidemia: A Meta-Analysis of 15 High-Quality Randomized Controlled Trials                                                         | 000749973900001 |
|                                                          | Efficacy of red yeast rice extract on myocardial infarction patients with borderline                                                                       | 000563055400006 |

|                                           |                                                                                                                                                             |                  |
|-------------------------------------------|-------------------------------------------------------------------------------------------------------------------------------------------------------------|------------------|
|                                           | hypercholesterolemia: A meta-analysis of randomized controlled trials                                                                                       |                  |
|                                           | Chinese red yeast rice ( <i>Monascus purpureus</i> ) for primary hyperlipidemia: a meta-analysis of randomized controlled trials                            | MEDLINE:17302963 |
| <b>Outcomes were not interested (n=3)</b> | Cholesterol-lowering effects of psyllium intake adjunctive to diet therapy in men and women with hypercholesterolemia: meta-analysis of 8 controlled trials | 000084906900012  |
|                                           | The effects of resistant starches on inflammatory bowel disease in preclinical and clinical settings: a systematic review and meta-analysis                 | 000588087100001  |
|                                           | Benefits of resistant starch type 2 for patients with end-stage renal disease under maintenance hemodialysis: a systematic review and meta-analysis         | 000604969000025  |



|                                      |     |     |     |     |     |     |    |     |     |     |     |     |     |     |     |     |     |   |
|--------------------------------------|-----|-----|-----|-----|-----|-----|----|-----|-----|-----|-----|-----|-----|-----|-----|-----|-----|---|
| Li et al, 2021<br>(China)            | Yes | Yes | Yes | Yes | PY  | Yes | PY | Yes | Yes | Yes | Yes | Yes | Yes | No  | Yes | Yes | Yes | M |
| Li et al. 2021<br>(China)            | Yes | No  | Yes | Yes | PY  | Yes | PY | Yes | Yes | Yes | Yes | Yes | Yes | Yes | Yes | Yes | Yes | M |
| Haghighatdoost et<br>al. 2021 (Iran) | Yes | No  | Yes | Yes | PY  | Yes | PY | Yes | Yes | Yes | Yes | Yes | Yes | PY  | Yes | PY  | Yes | M |
| Golzarand et al.<br>2021 (Iran)      | Yes | Yes | Yes | Yes | Yes | Yes | PY | Yes | Yes | Yes | Yes | Yes | Yes | Yes | Yes | Yes | Yes | H |
| Faghihimani et al.<br>2021 (Iran)    | Yes | No  | Yes | Yes | Yes | Yes | PY | Yes | Yes | Yes | Yes | Yes | PY  | PY  | Yes | Yes | Yes | M |
| Zhang et al. 2020<br>(China)         | Yes | No  | Yes | Yes | PY  | Yes | PY | Yes | Yes | Yes | Yes | Yes | No  | No  | Yes | Yes | Yes | L |
| Xiao et al. 2020<br>(China)          | Yes | No  | Yes | Yes | PY  | Yes | PY | Yes | Yes | Yes | Yes | Yes | Yes | Yes | Yes | Yes | Yes | M |
| Wang et al. 2020<br>(China)          | Yes | No  | Yes | Yes | PY  | Yes | PY | Yes | Yes | Yes | Yes | Yes | Yes | Yes | Yes | Yes | Yes | M |
| Vahdat et al. 2020<br>(Iran)         | Yes | No  | Yes | Yes | PY  | Yes | PY | Yes | Yes | Yes | Yes | Yes | Yes | No  | Yes | Yes | Yes | L |
| Ojo et al. 2020<br>(UK)              | Yes | No  | Yes | Yes | Yes | Yes | PY | Yes | Yes | Yes | Yes | Yes | Yes | No  | No  | No  | Yes | L |
| Halajzadeh et al.<br>2020 (Iran)     | Yes | No  | Yes | Yes | PY  | Yes | PY | Yes | Yes | Yes | Yes | Yes | No  | PY  | Yes | Yes | Yes | M |
| Clark et al. 2020<br>(UK)            | Yes | No  | Yes | Yes | PY  | Yes | PY | Yes | Yes | Yes | Yes | Yes | Yes | PY  | Yes | Yes | Yes | M |

|                                    |     |     |     |     |     |     |    |     |     |     |     |     |     |     |     |     |    |
|------------------------------------|-----|-----|-----|-----|-----|-----|----|-----|-----|-----|-----|-----|-----|-----|-----|-----|----|
| Wang et al. 2019<br>(China)        | Yes | No  | Yes | Yes | PY  | Yes | PY | Yes | Yes | Yes | Yes | No  | PY  | Yes | Yes | Yes | M  |
| Wang et al. 2019<br>(China)        | Yes | Yes | Yes | Yes | PY  | Yes | PY | Yes | Yes | Yes | Yes | Yes | Yes | Yes | Yes | Yes | H  |
| Snelson et al. 2019<br>(Australia) | Yes | Yes | Yes | Yes | PY  | Yes | PY | Yes | Yes | Yes | Yes | Yes | Yes | Yes | Yes | Yes | H  |
| Rao et al. 2019<br>(China)         | Yes | No  | Yes | Yes | Yes | Yes | PY | Yes | Yes | Yes | Yes | No  | No  | Yes | No  | Yes | CL |
| Jovanovski et al.<br>2019 (Canada) | Yes | Yes | Yes | Yes | PY  | Yes | PY | Yes | Yes | Yes | Yes | Yes | Yes | PY  | Yes | Yes | H  |
| Gao et al. 2019<br>(China)         | Yes | No  | Yes | Yes | Yes | Yes | PY | Yes | Yes | Yes | Yes | No  | PY  | Yes | Yes | Yes | M  |
| Khan et al. 2018<br>(Canada)       | Yes | Yes | Yes | Yes | PY  | PY  | PY | Yes | Yes | Yes | Yes | Yes | NO  | Yes | Yes | Yes | M  |
| Jovanovski et al.<br>2018 (Canada) | Yes | Yes | Yes | Yes | PY  | Yes | PY | Yes | Yes | Yes | Yes | Yes | Yes | PY  | Yes | Yes | M  |
| Thompson et al.<br>2017 (USA)      | Yes | Yes | Yes | Yes | PY  | Yes | PY | Yes | Yes | Yes | Yes | Yes | NO  | Yes | Yes | Yes | M  |
| Liu et al. 2017<br>(China)         | Yes | Yes | Yes | Yes | PY  | Yes | PY | Yes | Yes | Yes | Yes | Yes | Yes | Yes | Yes | Yes | H  |
| Hoang et al. 2017<br>(Canada)      | Yes | Yes | Yes | Yes | PY  | Yes | PY | Yes | Yes | Yes | Yes | Yes | PY  | Yes | Yes | Yes | H  |
| Shen et al. 2016<br>(China)        | Yes | No  | Yes | Yes | PY  | Yes | PY | Yes | Yes | Yes | Yes | PY  | PY  | Yes | Yes | Yes | M  |

|                                   |     |     |     |     |     |     |    |     |     |     |     |     |     |     |     |     |     |    |
|-----------------------------------|-----|-----|-----|-----|-----|-----|----|-----|-----|-----|-----|-----|-----|-----|-----|-----|-----|----|
| Ho et al. 2016<br>(Canada)        | Yes | Yes | Yes | Yes | PY  | Yes | PY | Yes | Yes | Yes | Yes | Yes | Yes | PY  | Yes | Yes | Yes | H  |
| Ho et al. 2016<br>(Canada)        | Yes | Yes | Yes | Yes | PY  | Yes | PY | Yes | Yes | Yes | Yes | Yes | Yes | PY  | Yes | Yes | Yes | H  |
| He et al. 2016<br>(China)         | Yes | No  | Yes | Yes | PY  | Yes | PY | Yes | Yes | Yes | Yes | Yes | Yes | Yes | Yes | Yes | Yes | M  |
| Zou et al. 2015<br>(China)        | Yes | No  | Yes | Yes | Yes | Yes | PY | Yes | Yes | Yes | Yes | Yes | Yes | Yes | Yes | Yes | Yes | M  |
| Zhu et al. 2015<br>(China)        | Yes | No  | Yes | Yes | PY  | Yes | PY | Yes | Yes | Yes | Yes | Yes | Yes | Yes | Yes | Yes | Yes | M  |
| Jiao et al. 2015<br>(China)       | Yes | No  | Yes | Yes | PY  | Yes | PY | Yes | Yes | Yes | Yes | Yes | Yes | Yes | Yes | Yes | Yes | M  |
| Evans et al. 2015<br>(UK)         | Yes | No  | Yes | Yes | PY  | Yes | PY | Yes | Yes | Yes | Yes | Yes | Yes | PY  | Yes | Yes | Yes | M  |
| Whitehead et al.<br>2014 (Canada) | Yes | No  | Yes | Yes | Yes | Yes | PY | Yes | Yes | Yes | Yes | Yes | No  | No  | Yes | Yes | Yes | L  |
| Silva et al. 2013<br>(Brazil)     | Yes | No  | Yes | Yes | PY  | Yes | PY | Yes | Yes | Yes | Yes | Yes | Yes | Yes | Yes | Yes | Yes | M  |
| Post et al. 2012<br>(USA)         | Yes | No  | Yes | Yes | PY  | Yes | PY | Yes | Yes | Yes | Yes | Yes | No  | No  | No  | Yes | Yes | M  |
| Tiwari et al. 2011<br>(Ireland)   | Yes | No  | Yes | Yes | PY  | PY  | PY | Yes | No  | Yes | Yes | Yes | No  | No  | No  | Yes | Yes | CL |
| AbuMweis et al.<br>2010 (Canada)  | Yes | No  | Yes | Yes | PY  | Yes | PY | Yes | PY  | Yes | Yes | Yes | No  | No  | Yes | Yes | Yes | L  |

|                                       |     |     |     |     |    |     |    |     |     |    |     |     |     |     |     |     |    |
|---------------------------------------|-----|-----|-----|-----|----|-----|----|-----|-----|----|-----|-----|-----|-----|-----|-----|----|
| Sood et al. 2008<br>(South Africa)    | Yes | No  | Yes | Yes | PY | Yes | PY | Yes | No  | No | Yes | Yes | Yes | Yes | Yes | Yes | L  |
| Brighenti et al. 2007<br>(Italy)      | Yes | No  | Yes | Yes | PY | PY  | PY | Yes | No  | No | Yes | No  | No  | No  | Yes | No  | CL |
| Whelton et al. 2005<br>(USA)          | Yes | No  | Yes | Yes | PY | PY  | PY | Yes | No  | No | Yes | No  | No  | Yes | Yes | No  | CL |
| Streppel et al. 2005<br>(Netherlands) | Yes | No  | Yes | Yes | PY | PY  | PY | Yes | Yes | No | Yes | PY  | Yes | Yes | Yes | No  | M  |
| Brown et al. 1999<br>(USA)            | Yes | No  | Yes | Yes | PY | PY  | PY | Yes | No  | No | Yes | No  | No  | Yes | Yes | No  | CL |
| Olson et al. 1997<br>(USA)            | Yes | Yes | Yes | Yes | PY | PY  | PY | Yes | No  | No | Yes | No  | No  | No  | Yes | No  | L  |

Q1: Did the research questions and inclusion criteria for the review include the components of PICO? Q2: Did the report of the review contain an explicit statement that the review methods were established prior to the conduct of the review and did the report justify any significant deviations from the protocol? Q3: Did the review authors explain their selection of the study designs for inclusion in the review? Q4: Did the review authors use a comprehensive literature search strategy? Q5: Did the review authors perform study selection in duplicate? Q6: Did the review authors perform data extraction in duplicate? Q7: Did the review authors provide a list of excluded studies and justify the exclusions? Q8: Did the review authors describe the included studies in adequate detail? Q9: Did the review authors use a satisfactory technique for assessing the risk of bias in individual studies that were included in the review? Q10: Did the review authors report on the sources of funding for the studies included in the review? Q11: If meta-analysis was performed, did the review authors use appropriate methods for statistical combination of results? Q12: If meta-analysis was performed, did the review authors assess the potential impact of risk of bias in individual studies on the results of the meta-analysis or other evidence synthesis? Q13: Did the review authors account for risk of bias in primary studies when interpreting/discussing the results of the review? Q14: Did the review authors provide a satisfactory explanation for, and discussion of, any heterogeneity observed in the results of the review? Q15: If they performed quantitative synthesis did the review authors carry out an adequate investigation of publication bias (small study bias) and discuss its likely impact on the results of the review? Q16: Did the review authors report any potential sources of conflict of interest, including any funding they received for conducting the review?

PY: Partial Yes; OC: Overall confidence; H: High; M: Moderate; L: Low; CL: Critically low

Table S4. The results of GRADE working group classification

Efficiency of dietary fiber compared to control group [health outcome]

Patients or population: including patients with diabetes mellitus, dyslipidemia, hypertension, overweight and obesity, metabolic syndrome, nonalcoholic fatty liver disease, healthy subjects

Intervention: efficiency of dietary fiber

Comparison: placebo or control group

| Outcomes | Anticipated absolute effects (95% CI) |                                          | Pooled ESs<br>(95% CI)  | No. of participants<br>(studies) | Certainty of the<br>evidence                 | Comments                                                                                                                                                                                                                                                                     |
|----------|---------------------------------------|------------------------------------------|-------------------------|----------------------------------|----------------------------------------------|------------------------------------------------------------------------------------------------------------------------------------------------------------------------------------------------------------------------------------------------------------------------------|
|          | Risk with control or<br>placebo       | Risk with efficiency of<br>dietary fiber |                         |                                  |                                              |                                                                                                                                                                                                                                                                              |
| FPG      | NA                                    | NA                                       | -0.55<br>(-0.73, -0.38) | 15464<br>(27 meta-analyses)      | ⊕ ⊕ ⊕ ○<br>Moderate <sup>a, b, c, d, e</sup> | Dietary fiber intake showed beneficial effects on glycaemic control by reducing the FPG levels. Moderate effect size. Statistically significant at $p < 0.001$ . ES of -0.55 lower represents the considerable difference between the groups and may be clinically relevant. |
| FPI      | NA                                    | NA                                       | -1.22<br>(-1.63, -0.82) | 7808<br>(18 meta-analyses)       | ⊕ ⊕ ⊕ ○<br>Moderate <sup>a, b, c, e</sup>    | Dietary fiber intake showed beneficial effects on glycaemic control by reducing the FPI levels. Moderate effect size. Statistically significant at $p < 0.001$ . ES of -1.22 lower represents the considerable difference between the groups and may be clinically relevant. |

|         |    |    |                         |                             |                                              |                                                                                                                                                                                                                                                                                  |
|---------|----|----|-------------------------|-----------------------------|----------------------------------------------|----------------------------------------------------------------------------------------------------------------------------------------------------------------------------------------------------------------------------------------------------------------------------------|
| HOMA-IR | NA | NA | -0.43<br>(-0.60, -0.27) | 6236<br>(15 meta-analyses)  | ⊕ ⊕ ⊕ ○<br>Moderate <sup>b, c, e</sup>       | Dietary fiber intake showed beneficial effects on glycaemic control by reducing the HOMA-IR levels. Moderate effect size. Statistically significant at $p < 0.001$ . ES of -0.43 lower represents the considerable difference between the groups and may be clinically relevant. |
| HbA1c   | NA | NA | -0.38<br>(-0.50, -0.26) | 8966<br>(18 meta-analyses)  | ⊕ ⊕ ⊕ ○<br>Moderate <sup>a, b, c, d, e</sup> | Dietary fiber intake showed beneficial effects on glycaemic control by reducing the HbA1c levels. Moderate effect size. Statistically significant at $p < 0.001$ . ES of -0.38 lower represents the considerable difference between the groups and may be clinically relevant.   |
| TC      | NA | NA | -0.28<br>(-0.39, -0.16) | 15529<br>(18 meta-analyses) | ⊕ ⊕ ⊕ ○<br>Moderate <sup>a, b, c, d, e</sup> | Dietary fiber intake showed beneficial effects on lipids profiles by reducing the TC levels. Moderate effect size. Statistically significant at $p < 0.001$ . ES of -0.28 lower represents the considerable difference between the groups and may be clinically relevant.        |

|               |    |    |                           |                             |                                              |                                                                                                                                                                                                                                                                                             |
|---------------|----|----|---------------------------|-----------------------------|----------------------------------------------|---------------------------------------------------------------------------------------------------------------------------------------------------------------------------------------------------------------------------------------------------------------------------------------------|
| TG            | NA | NA | -0.001<br>(-0.006, 0.004) | 14493<br>(18 meta-analyses) | ⊕ ⊕ ⊕ ⊙<br>Moderate <sup>b, c, d, e</sup>    | Dietary fiber intake showed no beneficial effects on lipids profiles in TG level. Moderate effect size. Statistically significant at $p=0.759$ .                                                                                                                                            |
| HDL-C         | NA | NA | -0.002<br>(-0.004, 0.000) | 13913<br>(19 meta-analyses) | ⊕ ⊕ ⊕ ⊕<br>High <sup>c, d</sup>              | Dietary fiber intake showed no beneficial effects on lipids profiles in HDL-C level. high effect size. Statistically significant at $p=0.087$ .                                                                                                                                             |
| LDL-C         | NA | NA | -0.25<br>(-0.34, -0.16)   | 21887<br>(23 meta-analyses) | ⊕ ⊕ ⊕ ⊙<br>Moderate <sup>a, b, c, d</sup>    | Dietary fiber intake showed beneficial effects on lipids profiles by reducing the TC levels. Moderate effect size. Statistically significant at $p<0.001$ . ES of -0.25 lower represents the considerable difference between the groups and may be clinically relevant.                     |
| TNF- $\alpha$ | NA | NA | -0.78<br>(-1.39, -0.16)   | 1647<br>(6 meta-analyses)   | ⊕ ⊕ ⊕ ⊙<br>Moderate <sup>a, b, c, d, f</sup> | Dietary fiber intake showed beneficial effects on systematic inflammations by reducing the TNF- $\alpha$ levels. Moderate effect size. Statistically significant at $p<0.001$ . ES of -0.78 lower represents the considerable difference between the groups and may be clinically relevant. |
| CRP           | NA | NA | -0.14<br>(-0.33, 0.05)    | 2780<br>(7 meta-analyses)   | ⊕ ⊕ ⊕ ⊕<br>High <sup>c, d, f</sup>           | Dietary fiber intake showed no beneficial effects on systematic inflammations in CRP levels. high effect size. Statistically significant at $p=0.156$ .                                                                                                                                     |

|     |    |    |                         |                           |                                        |                                                                                                                                                                                                                                                                           |
|-----|----|----|-------------------------|---------------------------|----------------------------------------|---------------------------------------------------------------------------------------------------------------------------------------------------------------------------------------------------------------------------------------------------------------------------|
| SBP | NA | NA | -1.72<br>(-2.13, -1.30) | 6827<br>(8 meta-analyses) | ⊕ ⊕ ⊕ ○<br>Moderate <sup>b, c, f</sup> | Dietary fiber intake showed beneficial effects on blood pressure by reducing the SBP levels. Moderate effect size. Statistically significant at $p < 0.001$ . ES of -1.72 lower represents the considerable difference between the groups and may be clinically relevant. |
| DBP | NA | NA | -0.67<br>(-0.96, -0.37) | 6827<br>(8 meta-analyses) | ⊕ ⊕ ⊕ ○<br>Moderate <sup>b, c, f</sup> | Dietary fiber intake showed beneficial effects on blood pressure by reducing the DBP levels. Moderate effect size. Statistically significant at $p < 0.001$ . ES of -0.67 lower represents the considerable difference between the groups and may be clinically relevant. |

<sup>a</sup> Due to the significant heterogeneity, the overall pooled effects should be explained with caution.

<sup>b</sup> Funnel plot shows several studies are scattered away from the plot indicating the existence of publication bias.

<sup>c</sup> All the studies have different dose levels of dietary fiber, thus, it is judged as a dose that may have a gradient.

<sup>d</sup> Since majority of studies have clearly proclaimed that the dietary fiber might or might not have beneficial effects it suggested for having spurious effect.

<sup>e</sup> Majority of the studies is performed at the same country and the studies recommend for more studies that are vigorous.

<sup>f</sup> Sample size is small and further studies are needed.

GRADE: grading of recommendations, assessment, development, and evaluation; CI: confidence interval; ES: effect size; FPG: fast plasma glucose; FPI: fast plasma insulin; HOMA-IR: homeostasis model of assessment-insulin resistance; HbA1c: glycosylated hemoglobin; TC: total cholesterol; TG: triglyceride; HDL-C: high density lipoprotein cholesterol; LDL-C: low density lipoprotein cholesterol; TNF- $\alpha$ : tumor necrosis factor-alpha; CRP: C-reactive protein; SBP: systolic blood pressure; DBP: diastolic blood pressure; ES: effect size; NA: not applicable.
